# Supplementary material for: Decision regret after treatment of primary or secondary brain tumors – a cross-sectional exploratory bicentric analysis
Source: Research Square preprint supplement (doi:10.21203/rs.3.rs-8822079/v1), 2026-02-11
Supplement: Supplementary file 1 [file 66fdb73b8cd207fc3cd7ca8d.docx]

**Suppl. Table 1 Predictors of DR per multiple linear regression analysis.** Complete-case analysis
(n = 145) with DR as the dependent variable. Confidence intervals are reported for the unstandardized regression coefficients (reference value = 0).

| **Variable** | ***β*** | **B** | **Lower 95% CIa** | **Upper 95% CI** | ***p*** |
| --- | --- | --- | --- | --- | --- |
| Global health/QoLb | 0.017 | 0.012 | -0.139 | 0.163 | .873 |
| Future uncertainty | 0.232 | 0.127 | 0.018 | 0.237 | **.023** |
| Depression | 0.088 | 0.290 | -0.388 | 0.969 | .399 |
| Satisfaction with medical care | -0.332 | -6.414 | -9.219 | -3.609 | **<.001** |
| Unemployment | 0.167 | 5.344 | 0.465 | 10.223 | **.032** |
| Brain metastasis | 0.153 | 4.880 | 0.095 | 9.665 | **.046** |
| Abbreviations: **a**CI, confidence interval; bQoL, quality of life. | | | | | |
